# Supplementary material for: Exosome-like nanoparticles from Arbutus unedo L. mitigate LPS-induced inflammation via JAK-STAT inactivation
Source: Royal Society of Chemistry journal article supplement (doi:10.1039/d4fo03646h), 2024-01-01
Supplement: d4fo03646h2.pdf [file d4fo03646h2.pdf]

Table S1. Primers used for the expression analyses.

| Gene         | Forward Primer                  | Reverse Primer                 |
|--------------|---------------------------------|--------------------------------|
| P0           | 5'-GAATCGCTCCTGCAGCAAAG-3'      | 5'-CCAGGGTCTCATCCGCATT-3'      |
| IL6          | 5'-CCACGGCCTTCCCTACTTC-3'       | 5'-TTGGGAGTGGTATCCTCTGTGA-3'   |
| CD80         | 5'-CAGGATTCGGCGCAGTAATAA-3'     | 5'-GTTTCTCTGCTTGCTCATTC-3'     |
| IL-1 $\beta$ | 5'-GGATGAGGACATGAGCACCT-3'      | 5'-AGCTCATATGGGTCCGACAG-3'     |
| Nos2         | 5'-CTGCTGGTGGTGACAAGCACATTT-3'  | 5'-ATGTCATGAGCAAAGGCGCAGAAC-3' |
| COX-2        | 5'-TGCCTCCCACT CAGACTAGA-3'     | 5'-TGCCTCCCACTCCAGACTAGA-3'    |
| IFN- $\beta$ | 5'-AAGAGTTACTACTGCCTTTGCCATC-3' | 5'-CACTGTCTGCTGGTGGAGTTCATC-3' |
| RelB         | 5'-GCGGATTTGCCGAATCAACAAGGA-3'  | 5'-ACATCAGCTTGAGAGAAGTCGGCA-3' |
| STAT1        | 5'-AGGAAATCAAGACCCTAGAAG-3'     | 5'-CTCCTTTCTCTTATTGTCAAGC-3'   |
| IRF1         | 5'-GAATCGCTCCTGCAGCAAAG-3'      | 5'-GAATCGCTCCTGCAGCAAAG-3'     |
| cRel         | 5'-ACCCAATTTATGACAACCGTGCCC-3'  | 5'-ACCTCTGGCTTCCCAGTCATTCAA-3' |
