# Supplementary figures and images for: Exosome-like nanoparticles from Arbutus unedo L. mitigate LPS-induced inflammation via JAK-STAT inactivation
Source: Royal Society of Chemistry journal article supplement (doi:10.1039/d4fo03646h), 2024-01-01

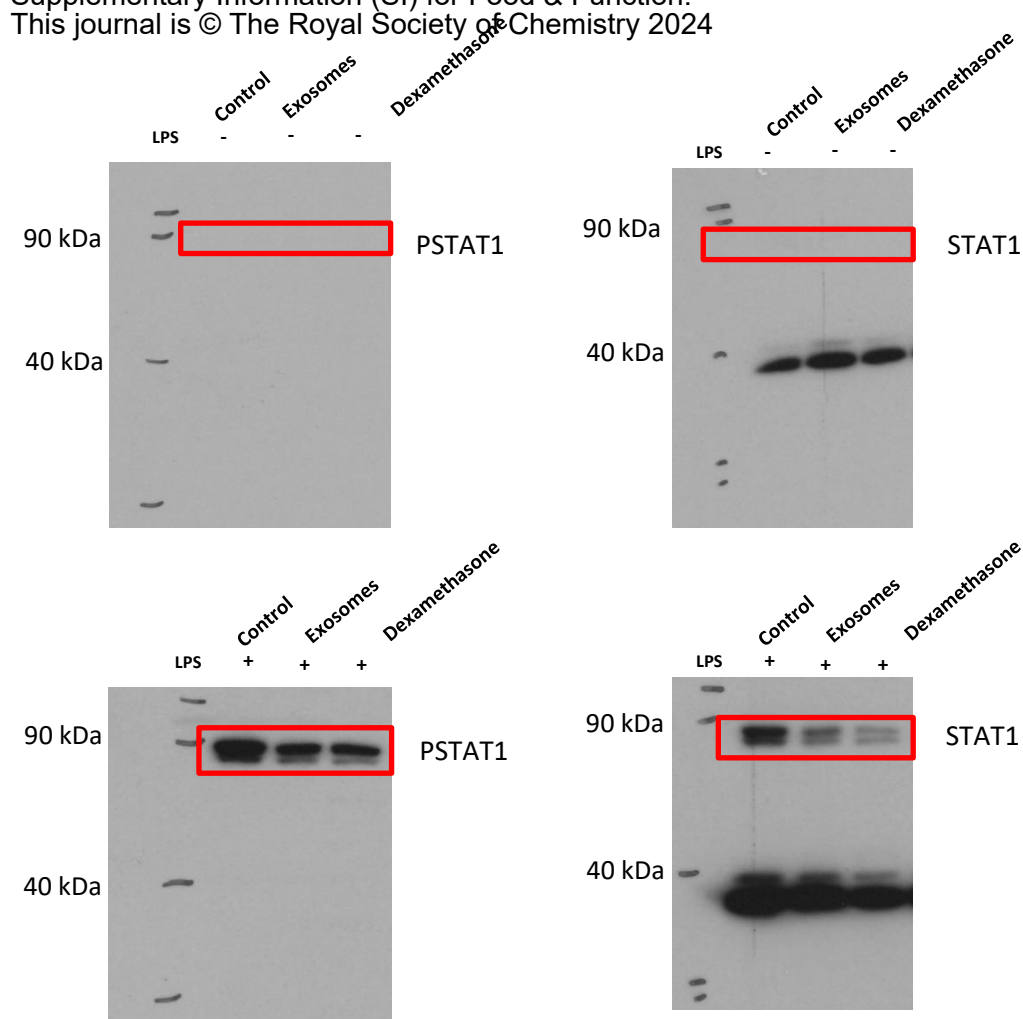

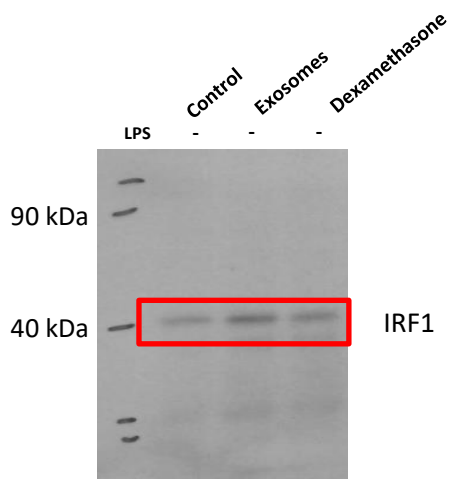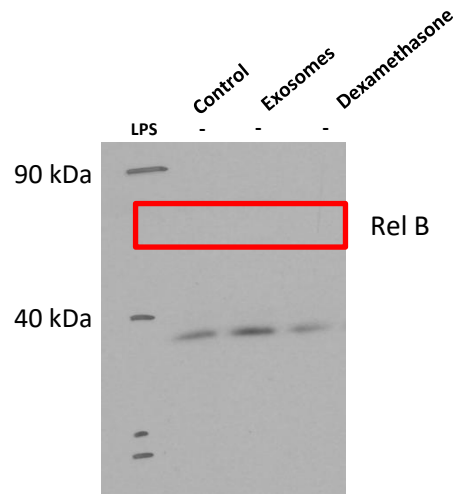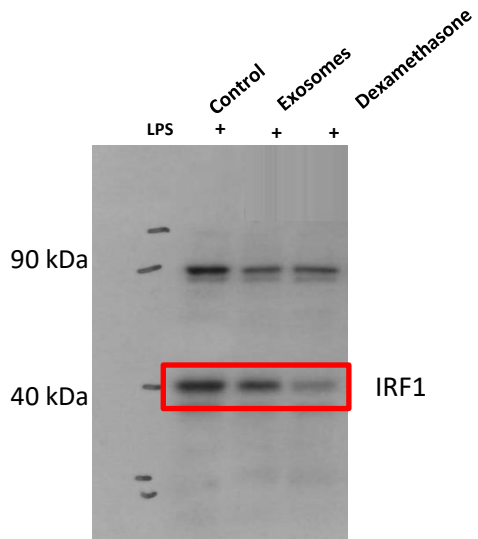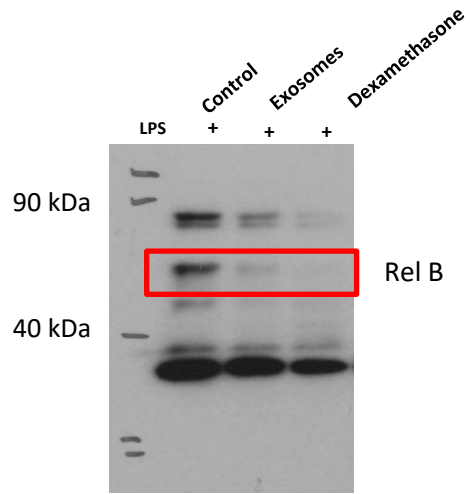

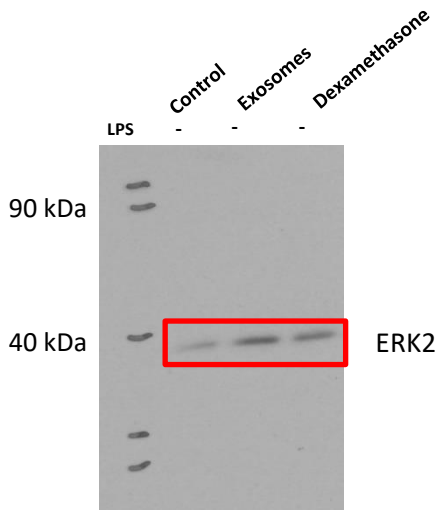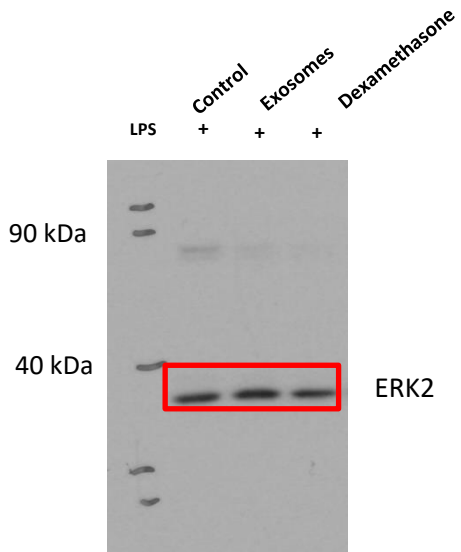

Supplement: d4fo03646h1.pdf [file d4fo03646h1.pdf]
